# Supplementary material
Source: MDPI journal article supplement (https://www.mdpi.com/2079-6412/8/7/246)
Supplement: s1 [file s1]

# Supplementary Materials: Corrosion Potential Modulation on Lead Anodes Using Water Oxidation Catalyst Coatings

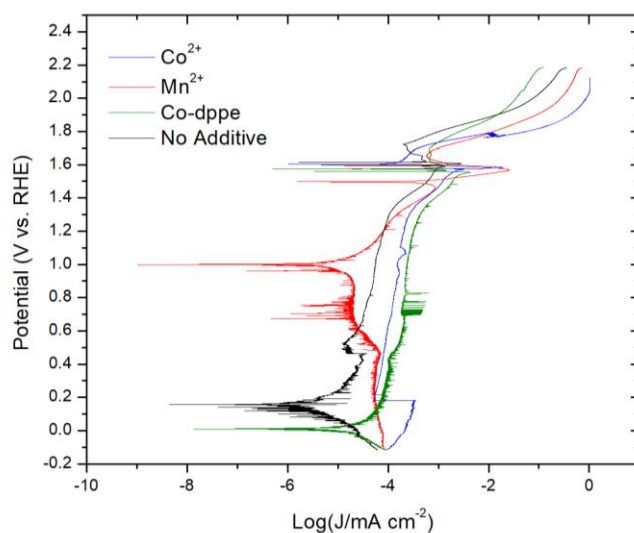

**Figure S1.** Exemplary linear sweep voltammograms. Exemplary linear sweep voltammograms that were used for determining polarized dynamic equilibrium potentials in Table S1.

**Table S1.** Exchange current densities. Exchange current density for polarized dynamic equilibrium potentials, extrapolated from data in Figure S1.

| Solution Additive      | Polarized Eq. $J_{corr}$ ( $\mu\text{A}/\text{cm}^2$ ) |
|------------------------|--------------------------------------------------------|
| None                   | 4.8                                                    |
| 5 g/L $\text{Co}^{2+}$ | 10.4                                                   |
| 5 g/L $\text{Mn}^{2+}$ | 0.38                                                   |
| Co-dppe                | 24.0                                                   |
